# Supplementary material
Source: PubMed Central journal article supplement (PMC5369478)

SUPPLEMENTARY FIGURE: The correlation between the rate of conversion of requested colonoscopy procedures to flexible sigmoidoscopy and performance indicators (polyp detection rate, use of sedation and patient discomfort). None of these indicators correlated significantly with conversion rate (Pearson correlation coefficient). The polyp detection rate includes all recorded polyps and does not distinguish between hyperplastic polyps and adenomas.

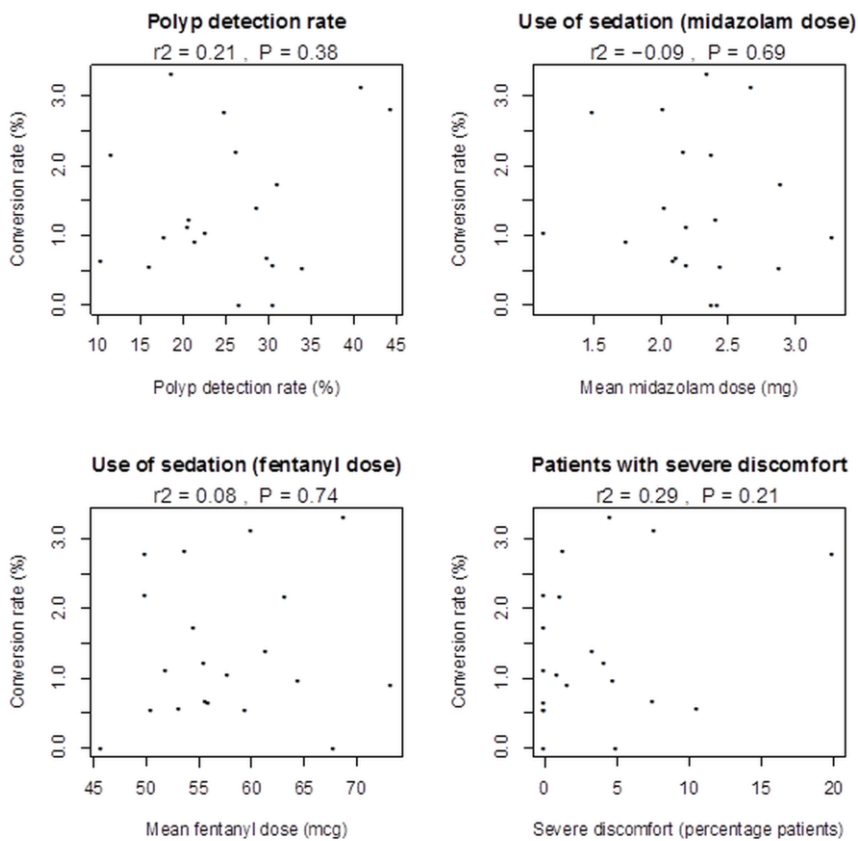

Supplement: flgastro-2015-100626-s1.pdf [file flgastro-2015-100626-s1.pdf]
