# Supplementary material
Source: PubMed Central journal article supplement (PMC5369478)
Supplement: flgastro-2015-100626-s2.pdf [file flgastro-2015-100626-s2.pdf]

| Indication for colonoscopy              | n |
|-----------------------------------------|---|
| Change in bowel habit                   | 9 |
| Gastrointestinal bleeding               | 6 |
| Abnormal CT                             | 6 |
| Inflammatory bowel disease surveillance | 6 |
| Polyp surveillance                      | 5 |
| Change in bowel habit with bleeding     | 3 |
| Planned EMR                             | 2 |
| Planned polypectomy                     | 2 |
| Family history                          | 1 |
| Iron-deficient anaemia                  | 1 |
| Tattoo and biopsies of known tumour     | 1 |
| Colorectal cancer follow-up             | 1 |

Supplementary table: Indication for colonoscopy for 45 cases of converted cases with no documented reason for conversion, by order of frequency. CT = computerised tomography; EMR = endoscopic mucosal resection.
